# Supplementary material
Source: HighWire-hosted journal article supplement (https://www.cmaj.ca/highwire/filestream/58373/field_highwire_adjunct_files/1/image-lemyze-2-at.pdf)

**Appendix 2:** Resting maximal flow-volume loop (curve 0) of a 72-year-old man with chronic obstructive pulmonary disease. The flow-volume loop shows the typical concave shape on expiration consistent with severe airflow obstruction. Flow-volume loops repeated every minute during an incremental exercise test (resting tidal volume curve 1 and curves 2–4 at higher ventilation levels). Note that end-expiratory lung volume exceeds functional residual capacity (FRC) at high ventilation level, defining dynamic pulmonary hyperinflation.

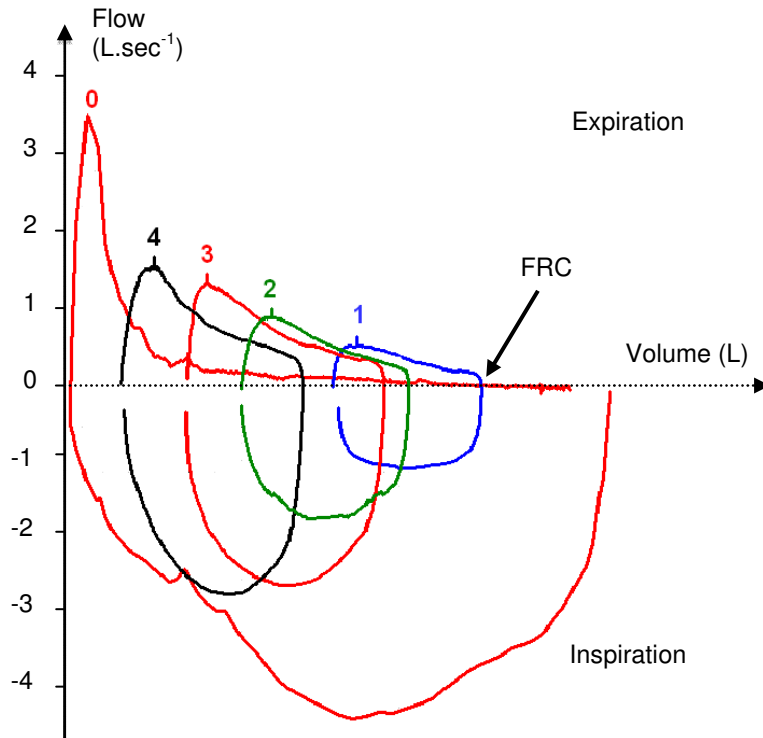

Supplement: image-lemyze-2-at.pdf [file image-lemyze-2-at.pdf]
